# Supplementary material
Source: PubMed Central journal article supplement (PMC1182409)

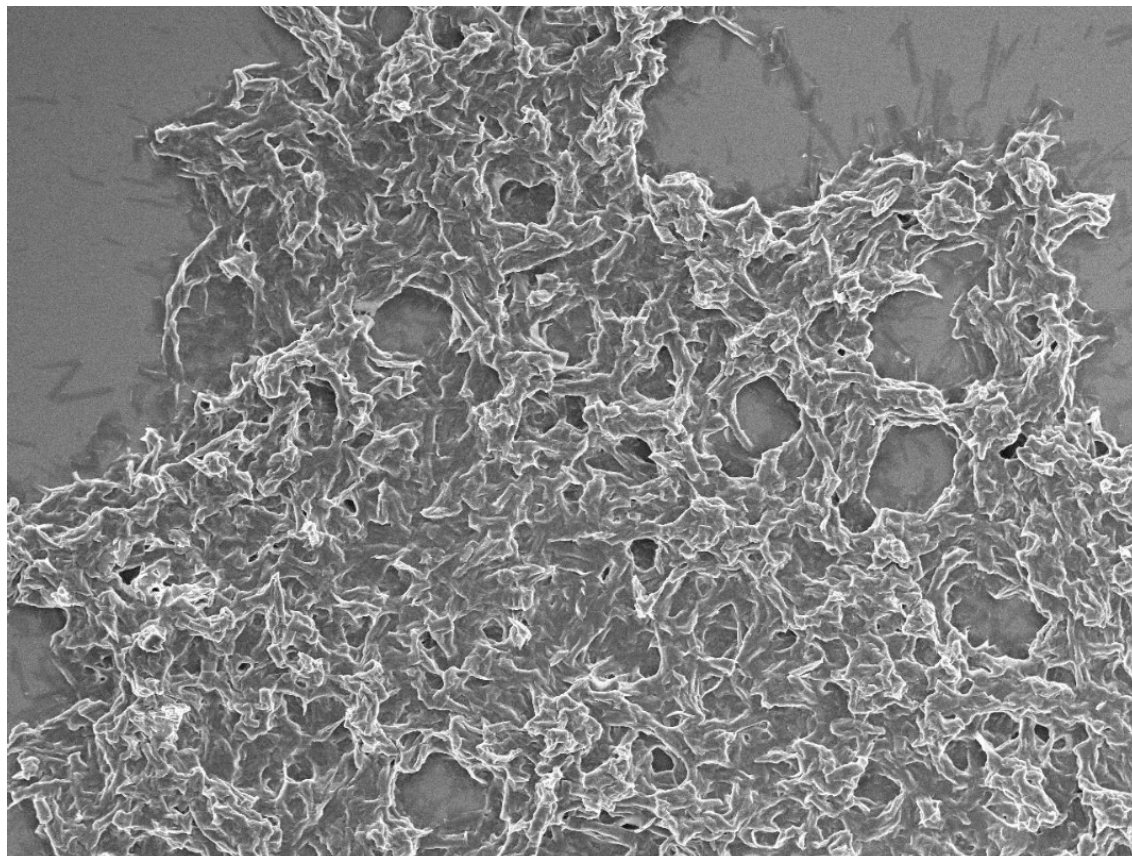

NONE

SEI

5.0kV

X750

10 $\mu$ m

WD 7.9mm

Supplement: pnas_0500852102_2.pdf [file pnas_0500852102_2.pdf]

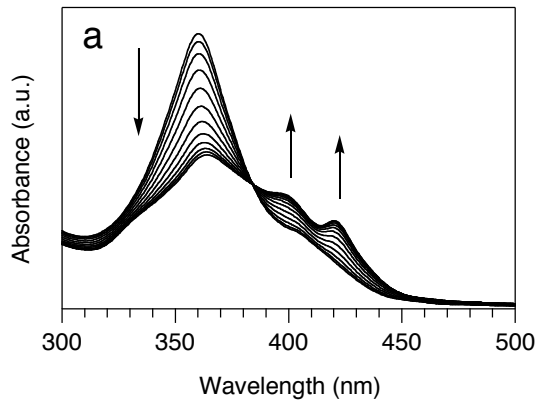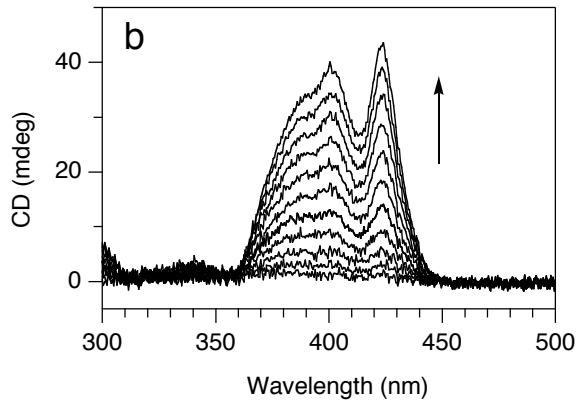

Supplement: pnas_0500852102_3.pdf [file pnas_0500852102_3.pdf]

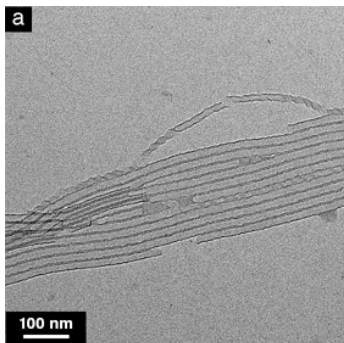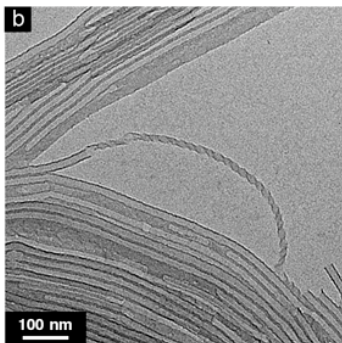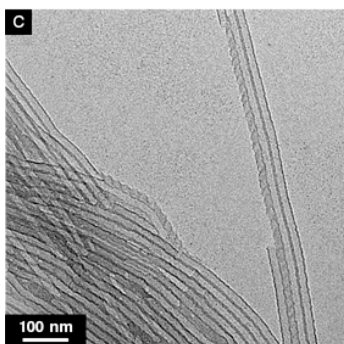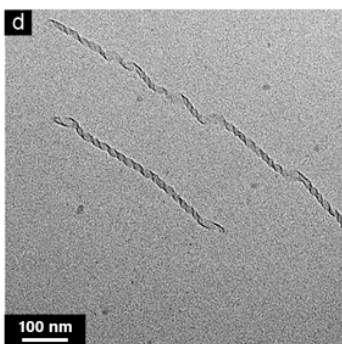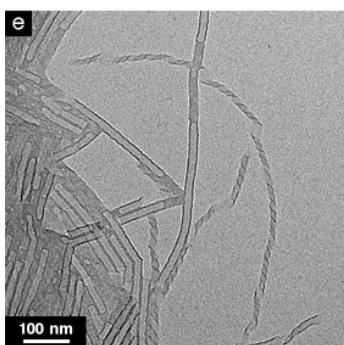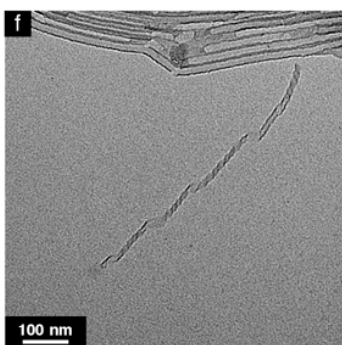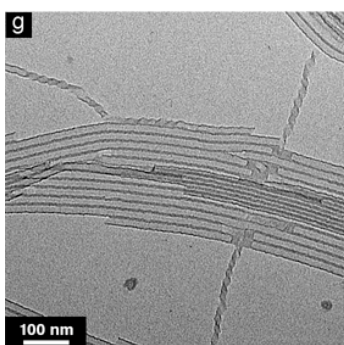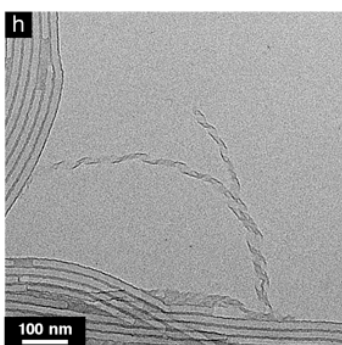

Supplement: pnas_0500852102_4.pdf [file pnas_0500852102_4.pdf]

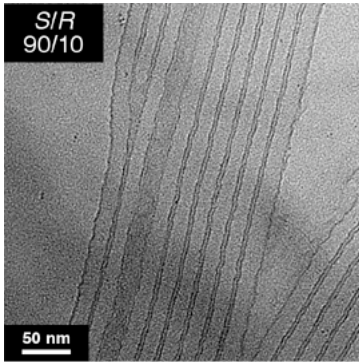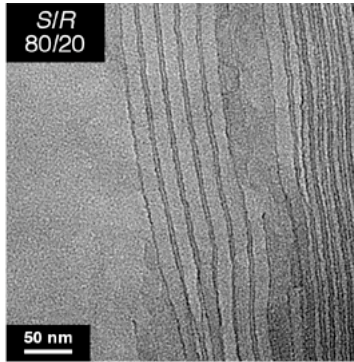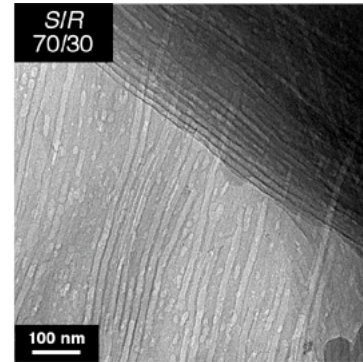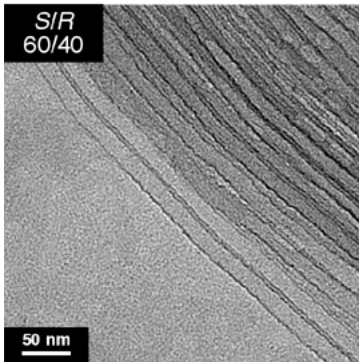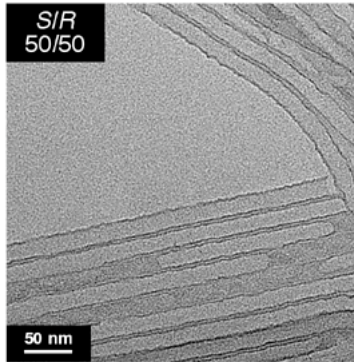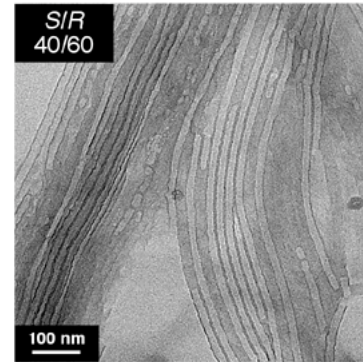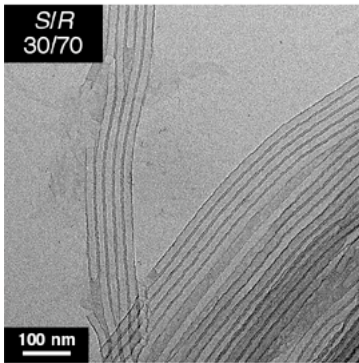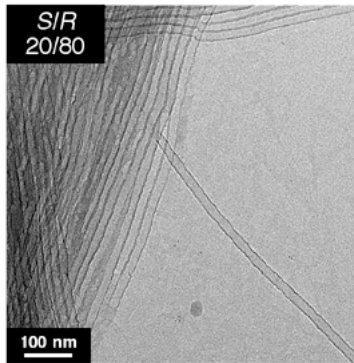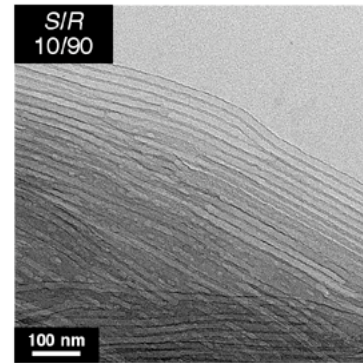

Supplement: pnas_0500852102_5.pdf [file pnas_0500852102_5.pdf]

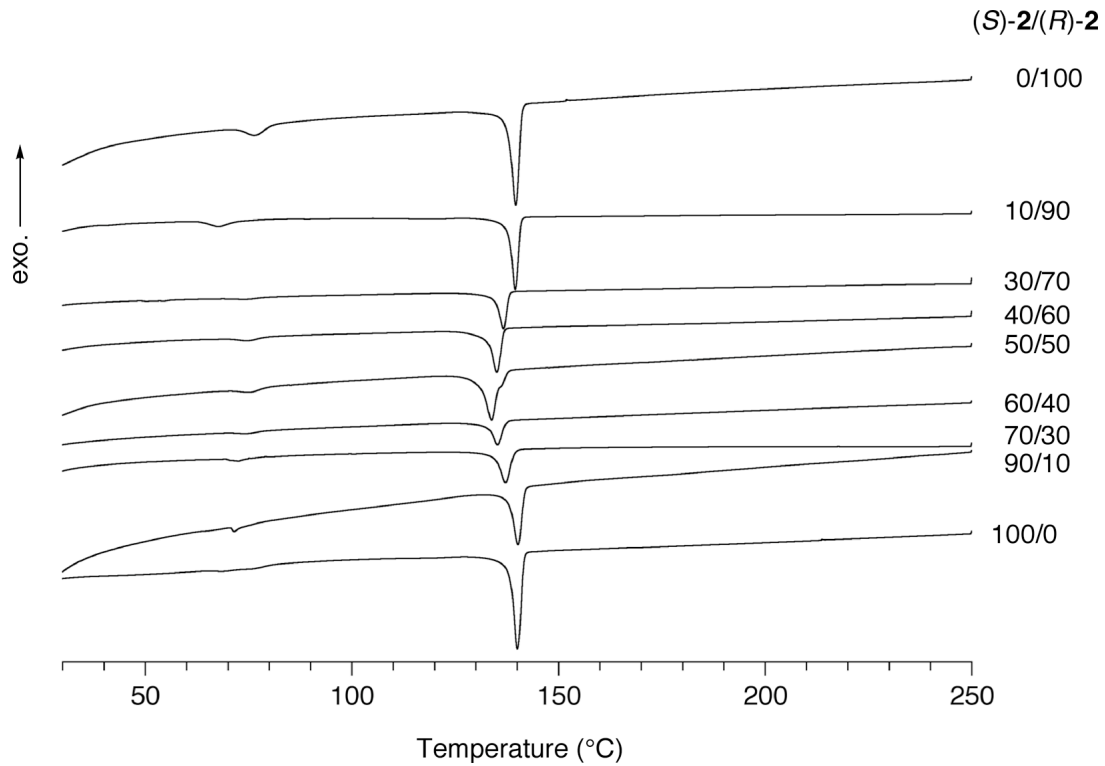

Supplement: pnas_0500852102_6.pdf [file pnas_0500852102_6.pdf]
